# Supplementary material
Source: publisher figshare collection journal article supplement (https://karger.figshare.com/articles/dataset/_/28787249)
Supplement: Supplementary file 1 [file 1]

| Table S1.The characteristics of 34 patients who were diagnosed with nonsteroidal anti-inflammatory drug hypersensitivity between January 2013 and December 2020 at Kocaeli University. | | | | | | | | | |
| --- | --- | --- | --- | --- | --- | --- | --- | --- | --- |
|  |  |  |  | **DIAGNOSIS** | | | |  |  |
|  |  |  |  | **Age at initial reaction,**  **y** | **Culprit Drug** | **Diagnostic DPT**  **(cumulative**  **dose, %)** | **Symptoms on Diagnostic DPT** | **Personal history of**  **co-existing disease** | **Atopy** |
| ***Included patients*** | **Class** | **Age,**  **y** | **Sex** |
| 1 | CR | 20,4 | F | 14,7 | Ibu | ASA (8) | Urticaria |  |  |
| 2 | CR | 20,4 | M | 16,6 | Diclo | ASA (100) | AE |  |  |
| 3 | CR | 19,6 | M | 12,8 | Diclo/ASA | ASA (42) | Anaphylaxis (ae+le) | Rhinitis | HDM |
| 4 | CR | 21,9 | M | 14,1 | Ibu/Parac/Met | Nimes(22) | Anaphylaxis (bs) | Asthma,  Rhinitis | Pollen |
| 5 | CR | 14,5 | M | 5,3 | Ibu | ASA(26) | Anaphylaxis (bs) | Rhinitis | Pollen, Animal |
| 6 | CR | 21,1 | M | 12 | Ibu | ASA (100) | AE | Rhinitis |  |
| 7 | CR | 25,5 | F | 15,8 | Ibu | ASA (14) | AE | Asthma,  Rhinitis | HDM, Pollen |
| 8 | CR | 17,5 | M | 11,9 | Ibu | ASA (14) | AE | Rhinitis | HDM, Pollen |
| 9 | CR | 14,2 | M | 9,4 | Ibu | ASA (100) | AE | Asthma,  Rhinitis | HDM, Animal |
| 10 | CR | 25 | F | 14 | Flurbi | ASA (42) | Anaphylaxis (ae+le) | Asthma,  Rhinitis,  Other drug allergy | HDM, Pollen,  Animal |
| 11 | CR | 19,3 | F | 12,6 | Ibu | ASA (42) | Anaphylaxis (ae+bs) | Asthma,  UAE | HDM, Pollen |
| 12 | SR | 16,5 | M | 11,7 | Ibu | Ibu (100) | UA | Asthma,  Rhinitis | HDM, Pollen,  Animal |
| 13 | SR | 8,7 | M | 0,6 | Ibu | Ibu (100) | Urticaria |  |  |
| 14 | CR | 15,4 | F | 9 | Ibu/Met | Ibu (100) | Urticaria | Asthma,  Rhinitis | HDM, Pollen |
| 15 | CR | 13,5 | M | 3,3 | Ibu/ASA | ASA (40) | Urticaria | UAE  Rhinitis, | HDM, Pollen |
| 16 | CR | 16,4 | M | 11,7 | Diclo/Parac | ASA (42) | UA | CSU  Rhinitis | HDM, Pollen |
| 17 | CR | 11,2 | F | 3,6 | Ibu | ASA (20) | Urticaria |  |  |
| 18 | CR | 19,4 | F | 16,2 | Ibu | ASA (100) | AE |  |  |
| 19 | NC | 9 | M | 4,9 | Ibu | Ibu (100) | Urticaria | Asthma, Rhinitis | Pollen |
| 20 | CR | 13,2 | F | 8,5 | Ibu/Diclo | ASA (100) | AE |  |  |
| 21 | NC | 11,3 | M | 3,6 | Ibu/Parac | Ibu (50) | Urticaria |  |  |
| 22 | SR | 24,6 | M | 14 | Flurbi | Flurbi (100) | Anaphylaxis (ua+bs) |  |  |
| 23 | CR | 5,7 | M | 1,7 | Ibu | ASA (100) | UA | UAE  Rhinitis | HDM |
| ***Excluded patients*** |  |  |  |  |  |  |  |  |  |
| 24 | CR | 15,5 | M | 3,5 | Ibu, ASA | ASA (20) | UA | Rhinitis | HDM |
| 25 | CR | 26,2 | F | 15 | Ibu | ASA (10) | Urticaria | CSU | HDM, Pollen |
| 26 | CR | 15,5 | F | 3,5 | Ibu | ASA (30) | Urticaria |  |  |
| 27 | CR | 13 | M | 4 | Ibu | ASA (50) | UA |  |  |
| 28 | CR | 15 | M | 7 | Ibu | ASA (50) | Urticaria | Other drug allergy |  |
| 29 | CR | 22,7 | F | 15 | Ibu | ASA (100) | Urticaria | Asthma, Rhinitis |  |
| 30 | CR | 25 | F | 17 | Ibu | ASA (100) | AE | Rhinitis | HDM |
| 31 | NC | 14,7 | M | 11 | Ibu | Ibu (100) | AE |  |  |
| 32 | NC | 23 | M | 18 | Ibu | Ibu (100) | Anaphylaxis (AE+BS) | CSU | HDM, Pollen |
| 33 | NC | 21 | M | 15 | Flurbi | Flurbi (100) | Urticaria | Asthma | HDM |
| 34 | CR | 15 | M | 7 | Ibu | ASA (100) | AE |  |  |
| AE: Angioedema without urticaria, ASA: Acetylsalicylic acid, BS: Bronchospasm CR:Cross reactive, CSU: Chronic spontaneous urticaria, Diclo: Diclofenac, DPT:Drug provocation test, F: Female, Flurbi: Flurbiprophen, HDM: House dust mite, Ibu: Ibuprofen, LE:Larynxedema, M: Male, Met: Metamizole, NC Not classified, Nimes: Nimesulid, Parac: Paracetamol, SR:Selective Reactive, UA: Urticaria with angioedema, Y:year | | | | | | | | | |
